# Supplementary material for: Transcriptomic, biochemical and physio-anatomical investigations shed more light on responses to drought stress in two contrasting sesame genotypes
Source: PubMed Central journal article supplement (PMC5562740; doi:10.1038/s41598-017-09397-6), 2017-08-18

## Transcriptomic, biochemical and physio-anatomical investigations shed more light on responses to drought stress in two contrasting sesame genotypes

Komivi Dossa<sup>1,2,3</sup>, Donghua Li<sup>1</sup>, Linhai Wang<sup>1</sup>, Xiaomin Zheng<sup>4</sup>, Aili Liu<sup>1</sup>, Jingyin Yu<sup>1</sup>, Xin Wei<sup>1</sup>, Rong Zhou<sup>1</sup>, Daniel Fonceka<sup>2,5</sup>, Diaga Diouf<sup>3</sup>, Boshou Liao<sup>1</sup>, Ndiaga Cissé<sup>2</sup> & Xiurong Zhang<sup>1</sup>

### Supplementary Figures

**Supplementary Figure S1.** Dynamics of expressed genes during time-course of drought stress and after rewatering in DT and DS

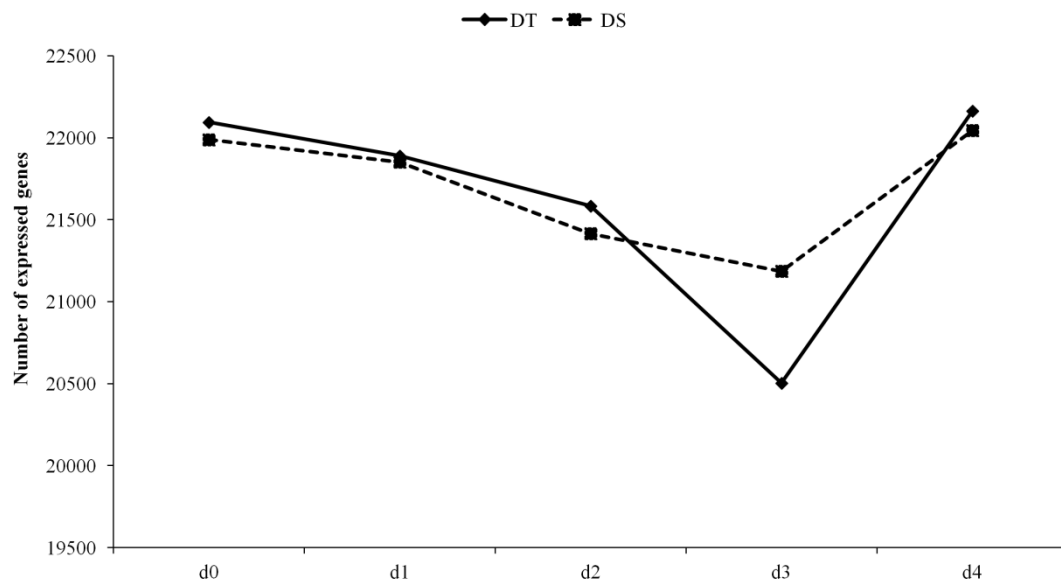

**Supplementary Figure S2.** Volcano plot of DEGs in DT and DS during time-course of drought stress and after rewatering with d<sub>0</sub> as control

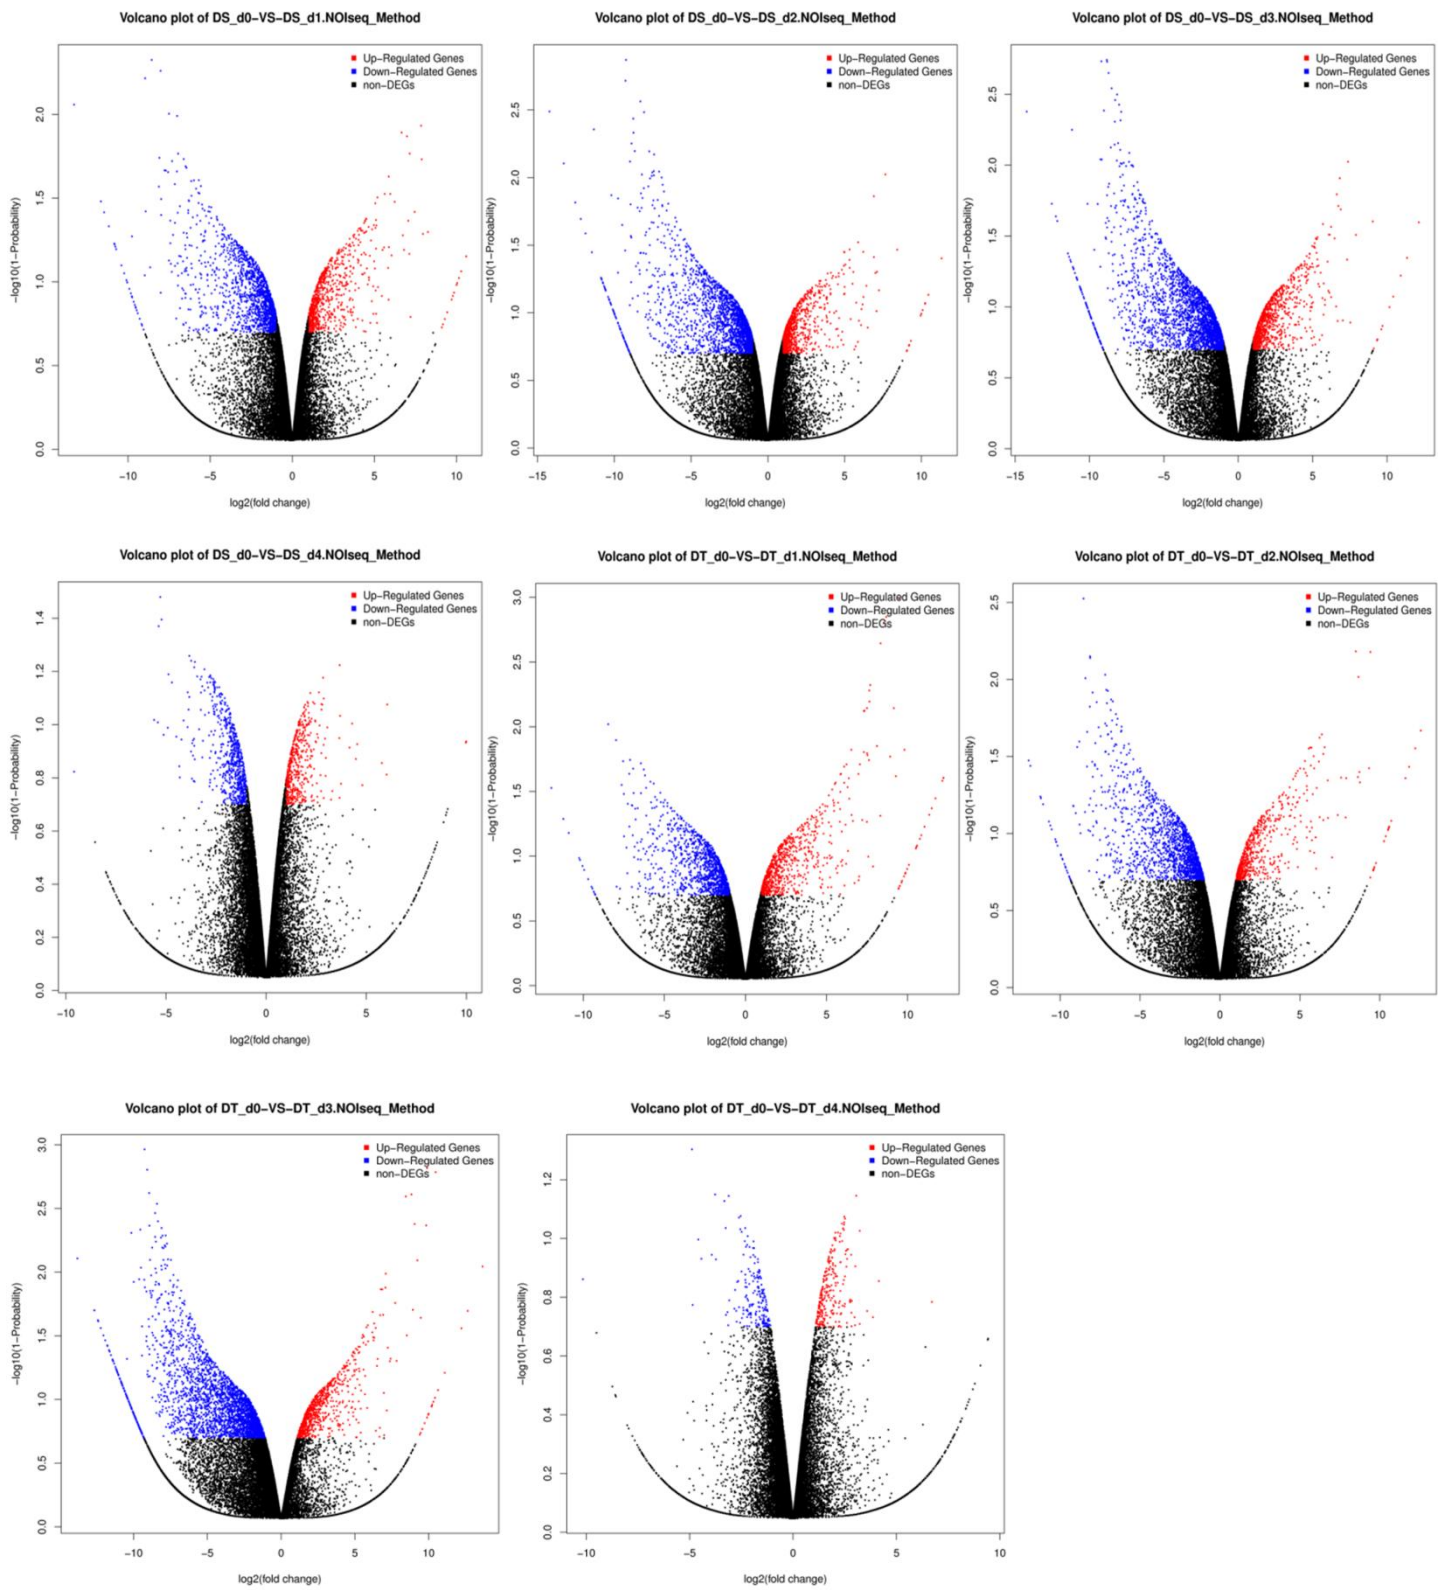

**Supplementary Figure S3.** KEGG pathway enrichment of DEGs in DT and DS during time-course of drought stress and after rewatering

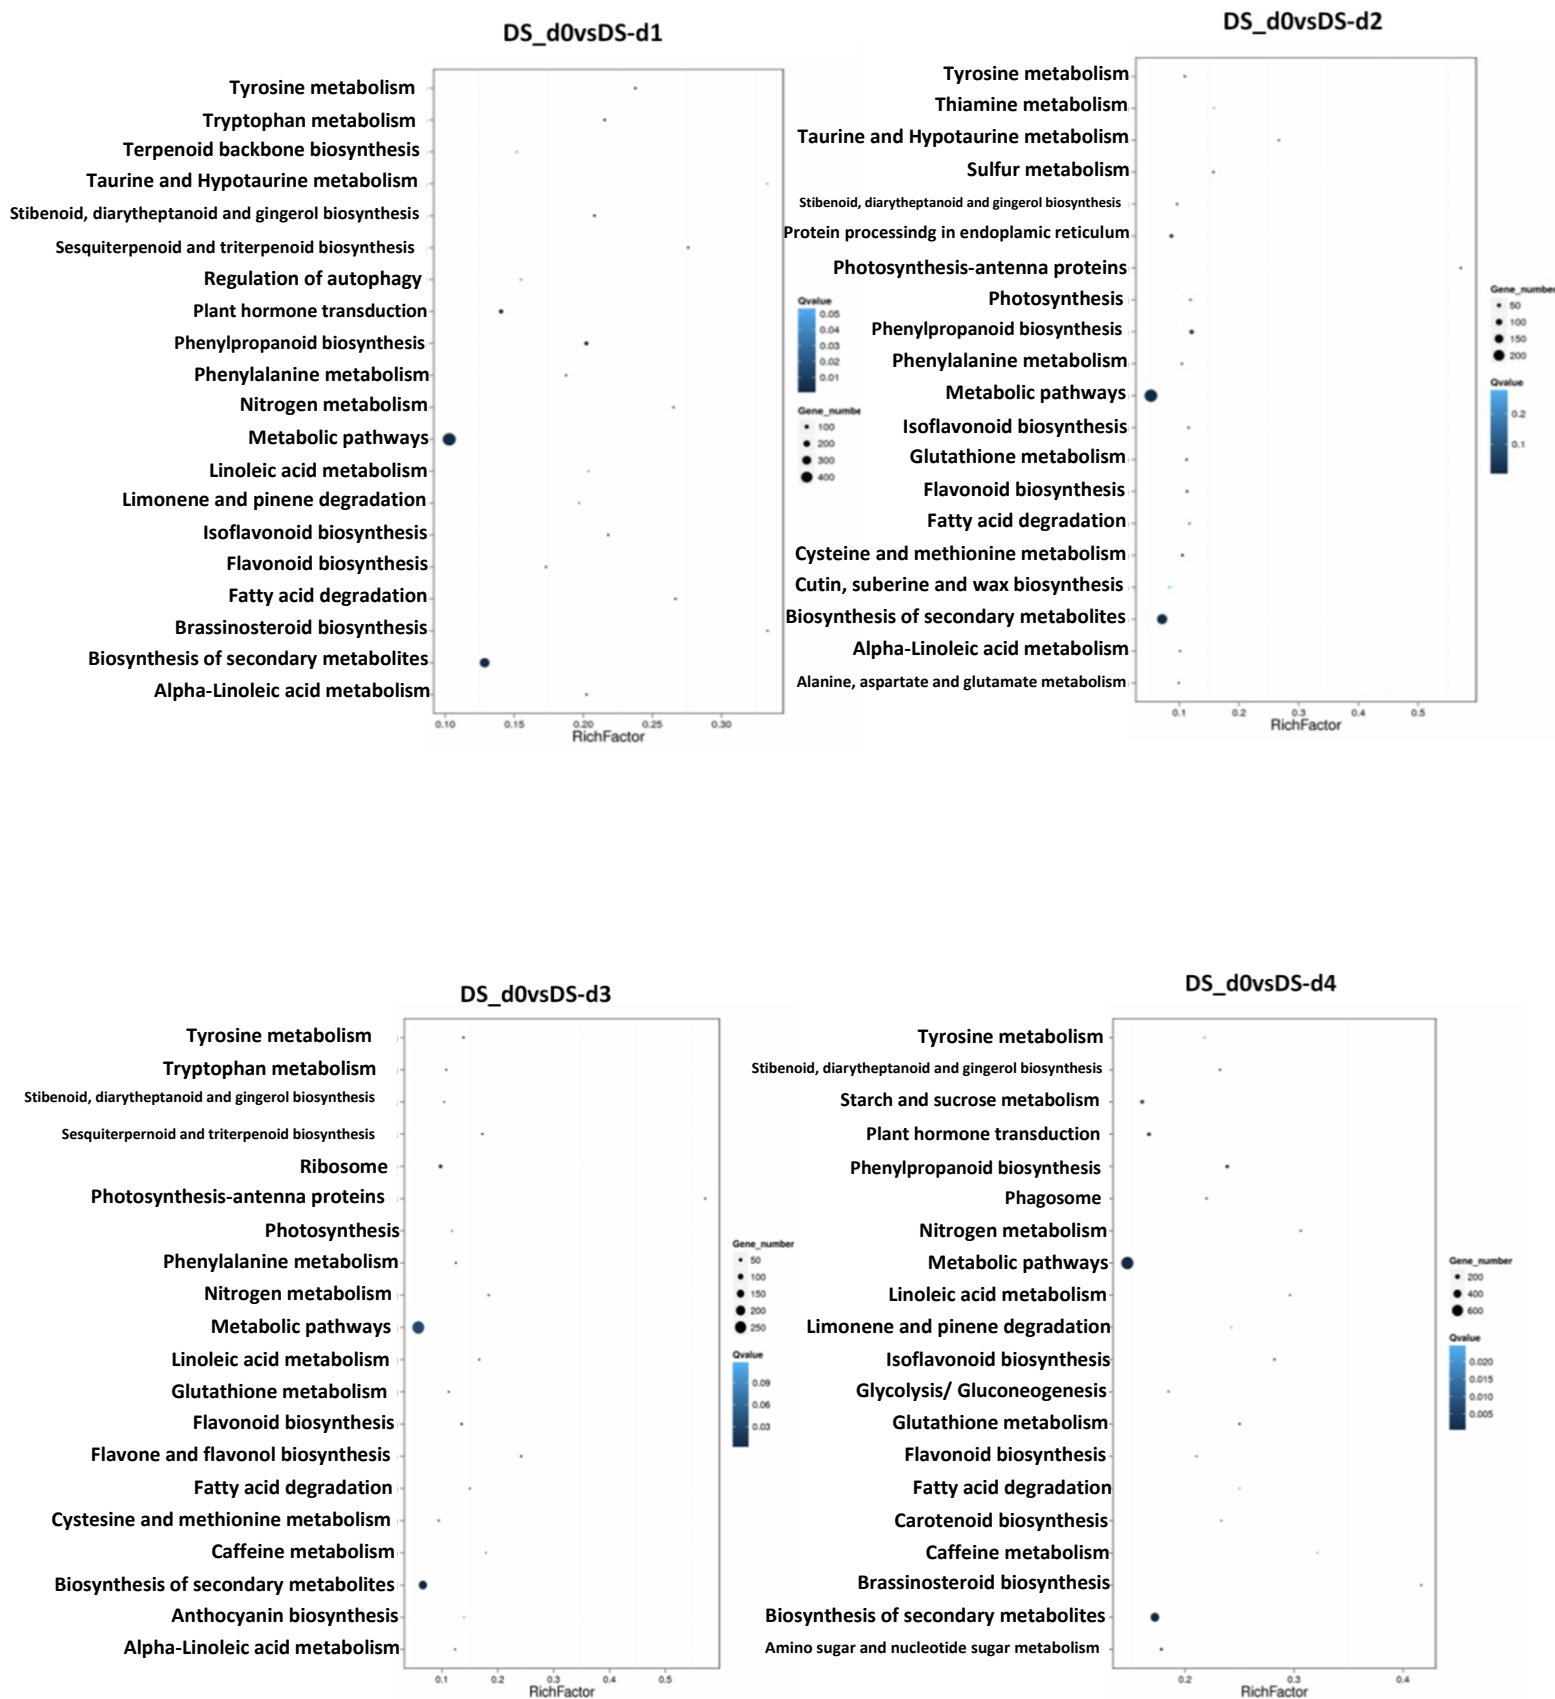

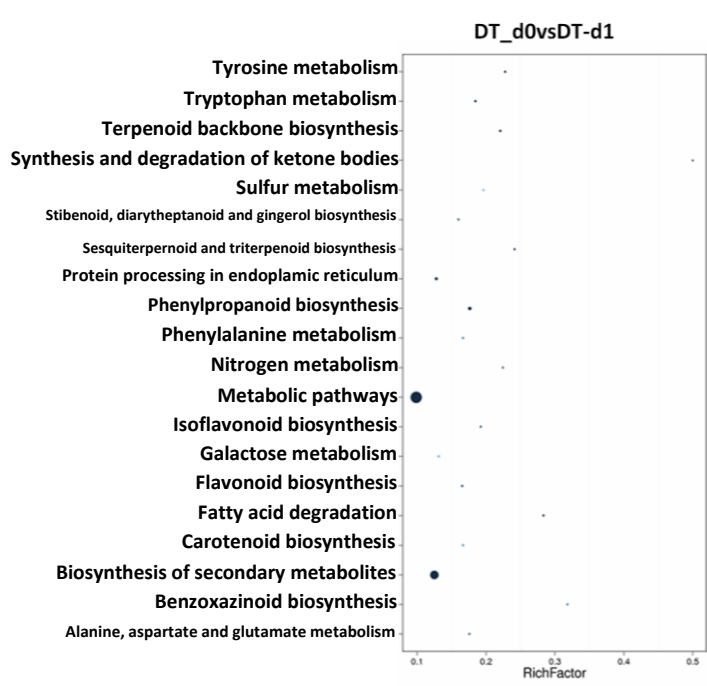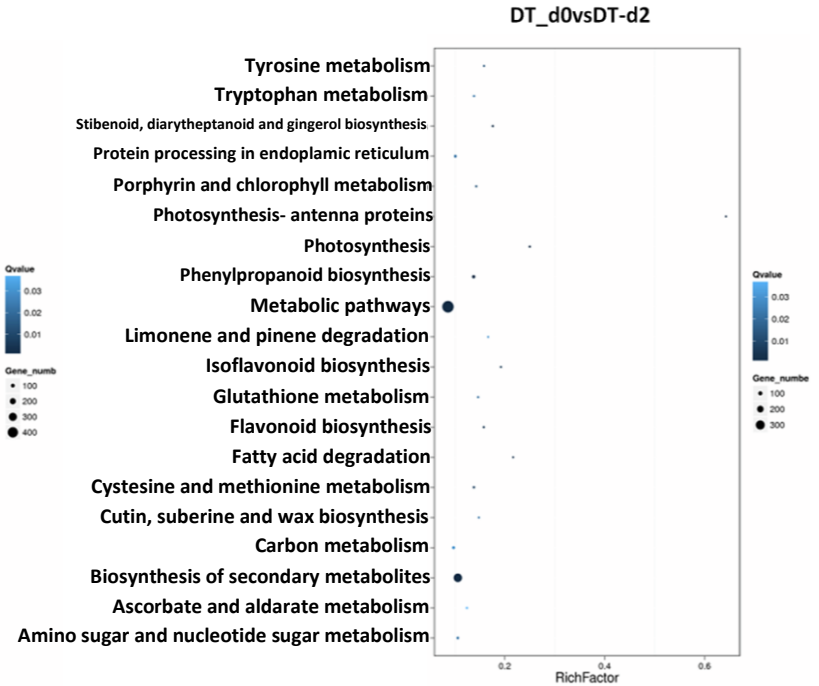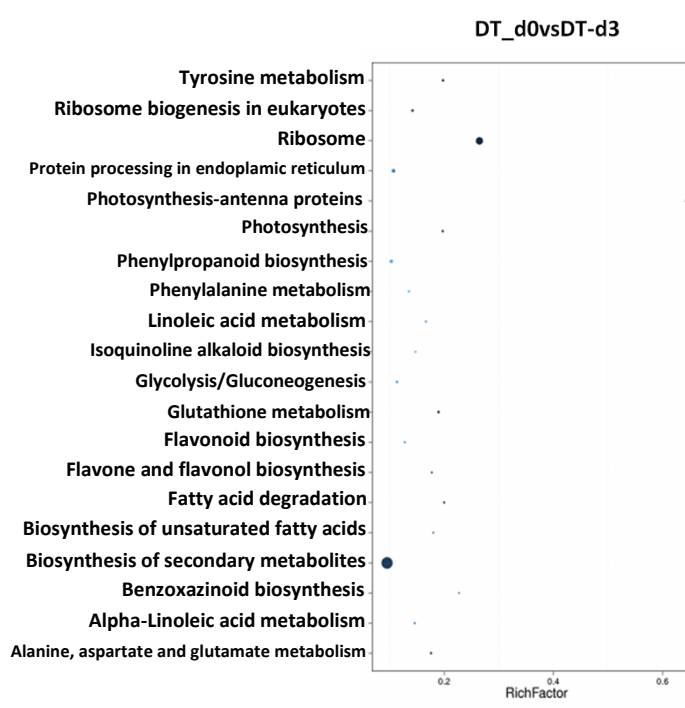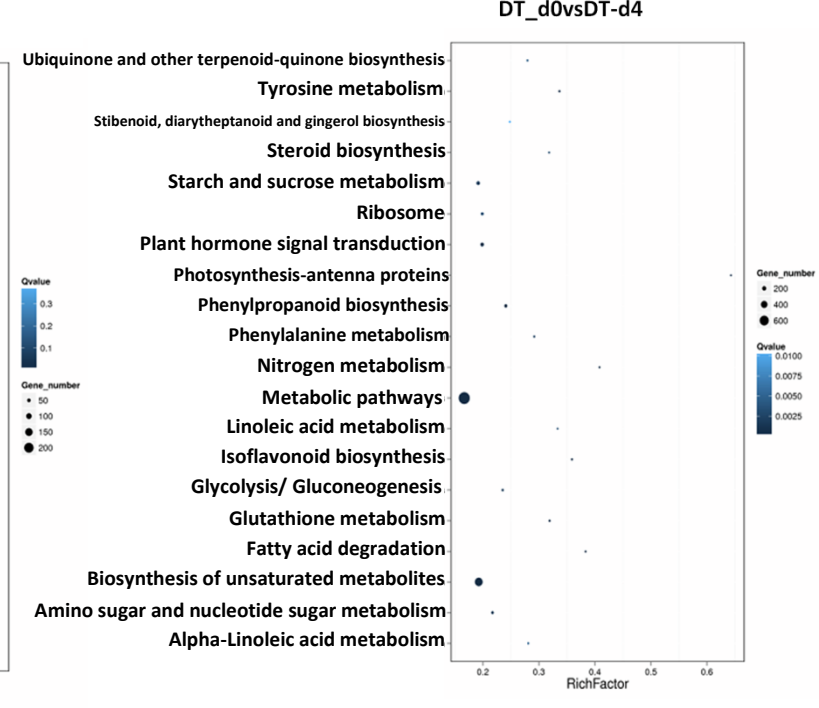

**Supplementary Figure S4.** Gene ontology enrichment of DEGs in DT and DS during time-course of drought stress

**DS\_d0vsDS-d1**

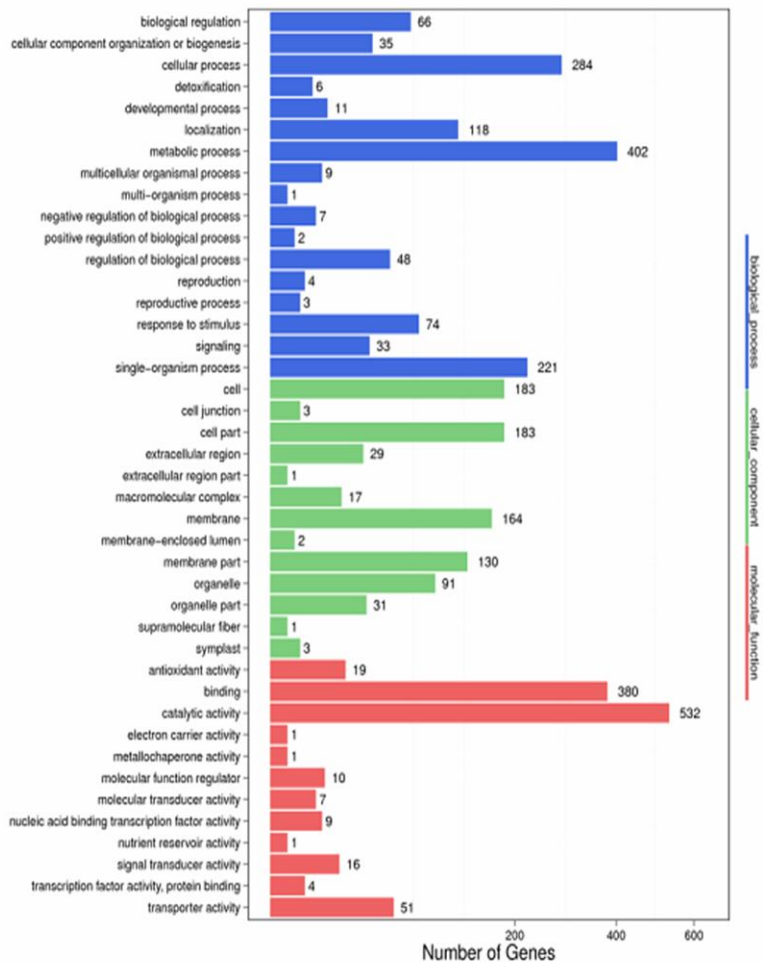

**DS\_d0vsDS-d2**

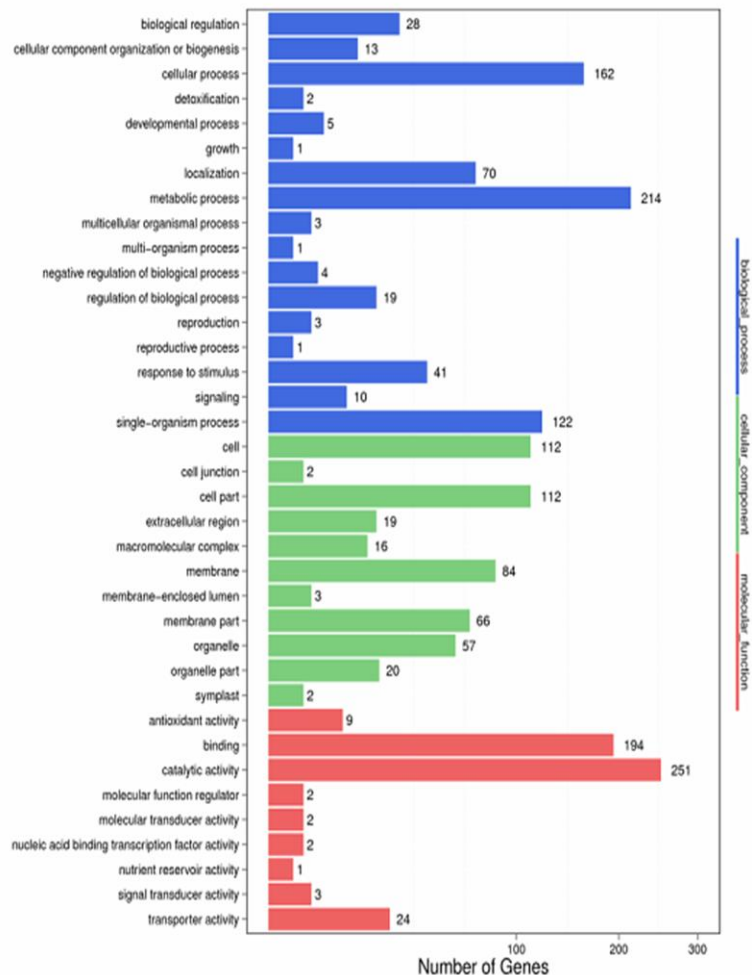

DS\_d0vsDS-d3

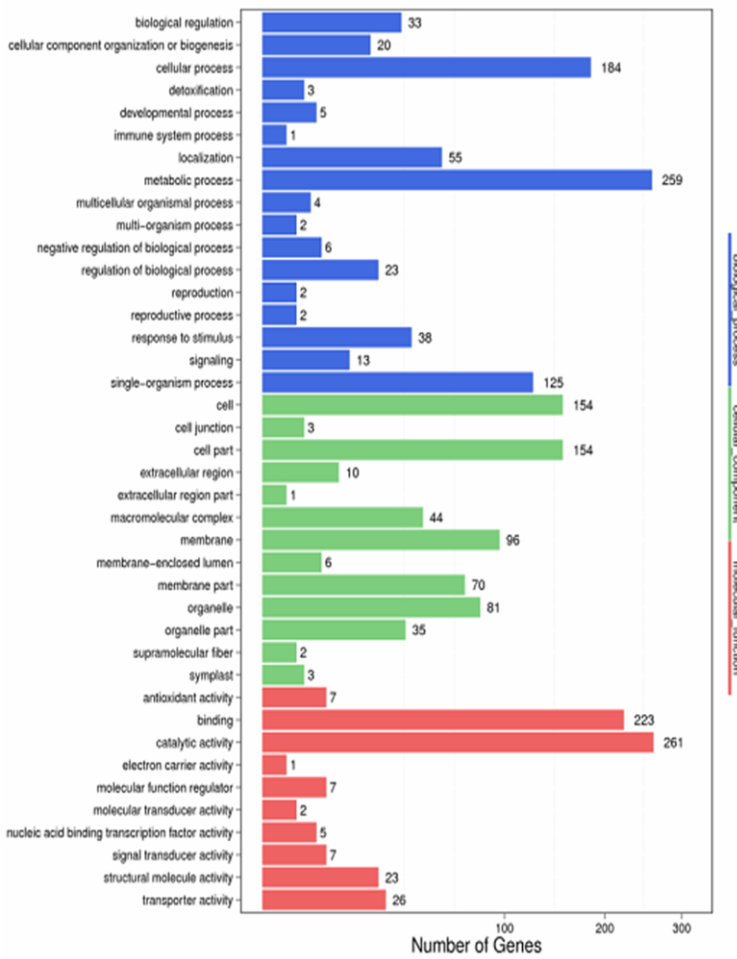

DT\_d0vsDT-d1

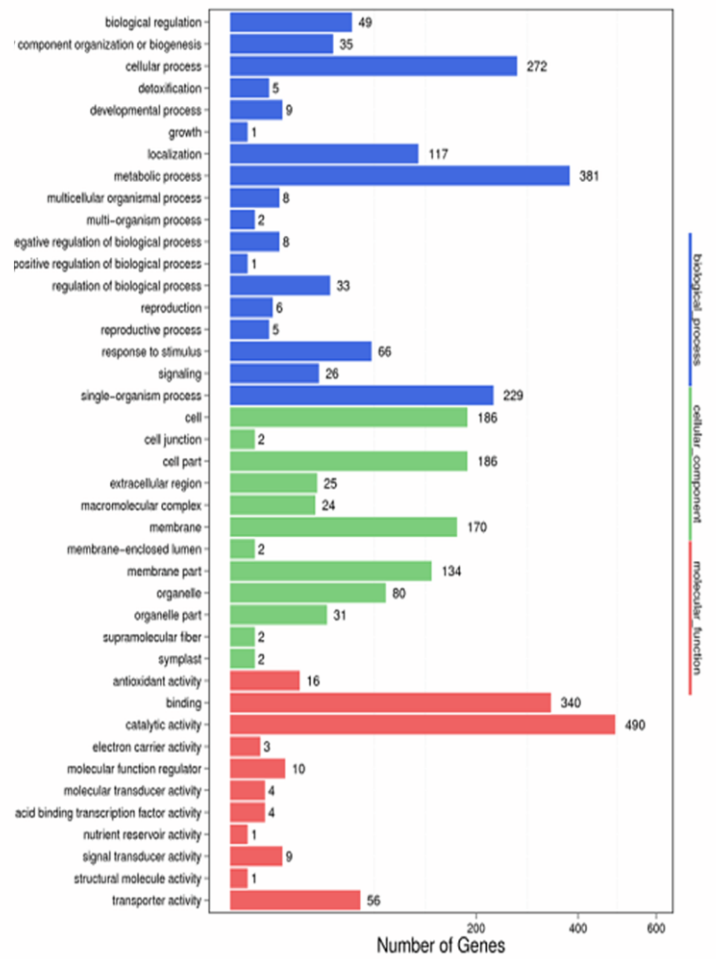

DT\_d0vsDT-d2

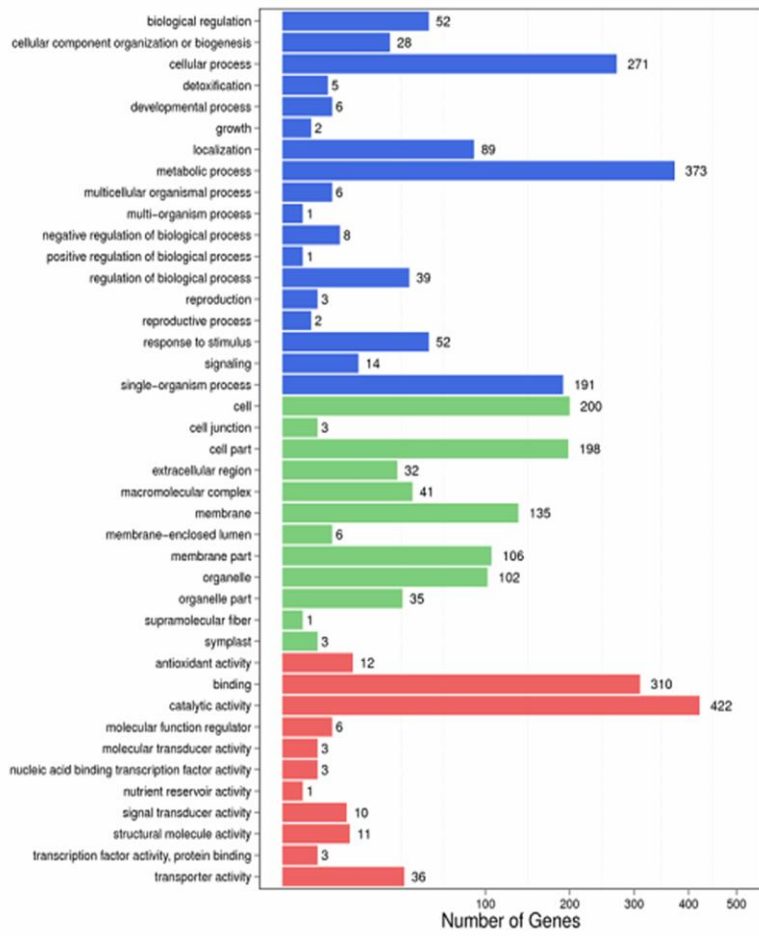

DT\_d0vsDT-d3

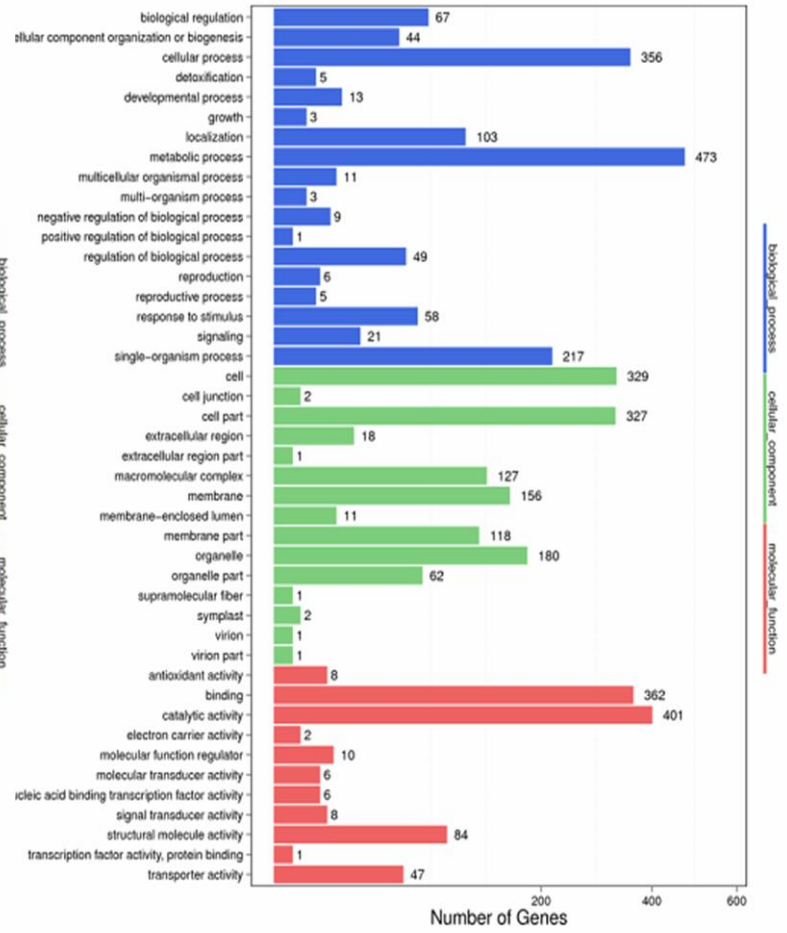

**Supplementary Figure S5.** Venn diagram depicting the core gene set involved in sesame response to drought

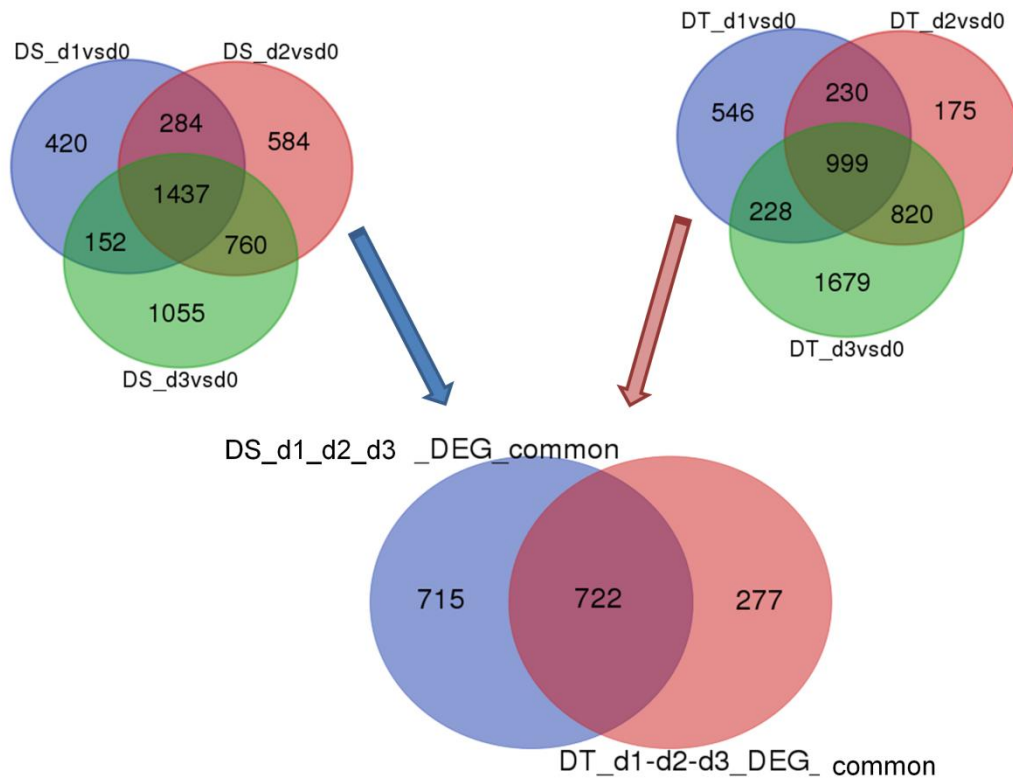



**Supplementary Figure S6.** Validation of selected differentially expressed genes by quantitative real-time PCR

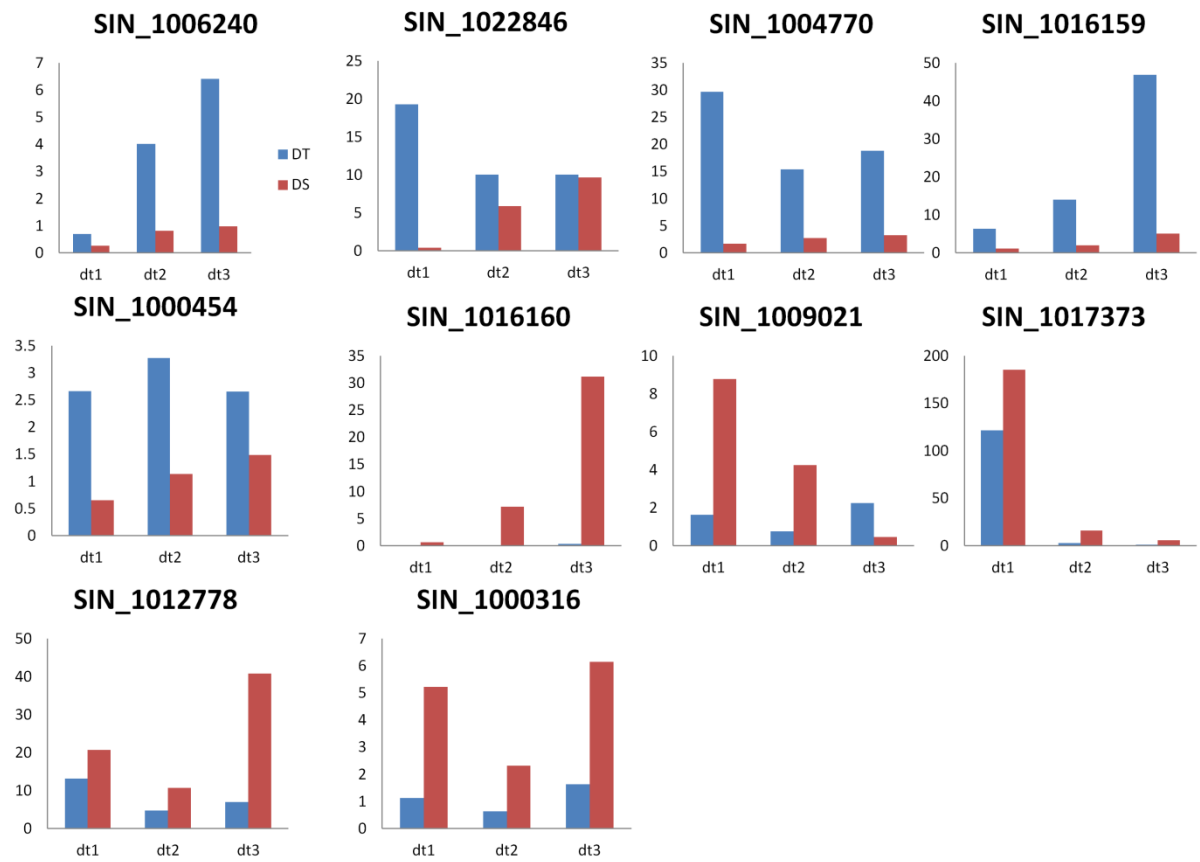

Supplement: 41598_2017_9397_MOESM9_ESM.pdf [file 41598_2017_9397_MOESM9_ESM.pdf]
